# Supplementary material for: A New Immortalized Human Lacrimal Gland Cell Line
Source: MDPI journal article supplement (doi:10.3390/cells13070622), 2024-04-03
Supplement: s1 [file s1]

Supplemental material for

**A new immortalized human lacrimal gland cell line**

Sophie Gleixner *et al.*

\*Corresponding author. Email: [philipp.arnold@fau.de](mailto:philipp.arnold@fau.de)

**This PDF file includes:**

Figures S1 to S5  
Table S1 and S2

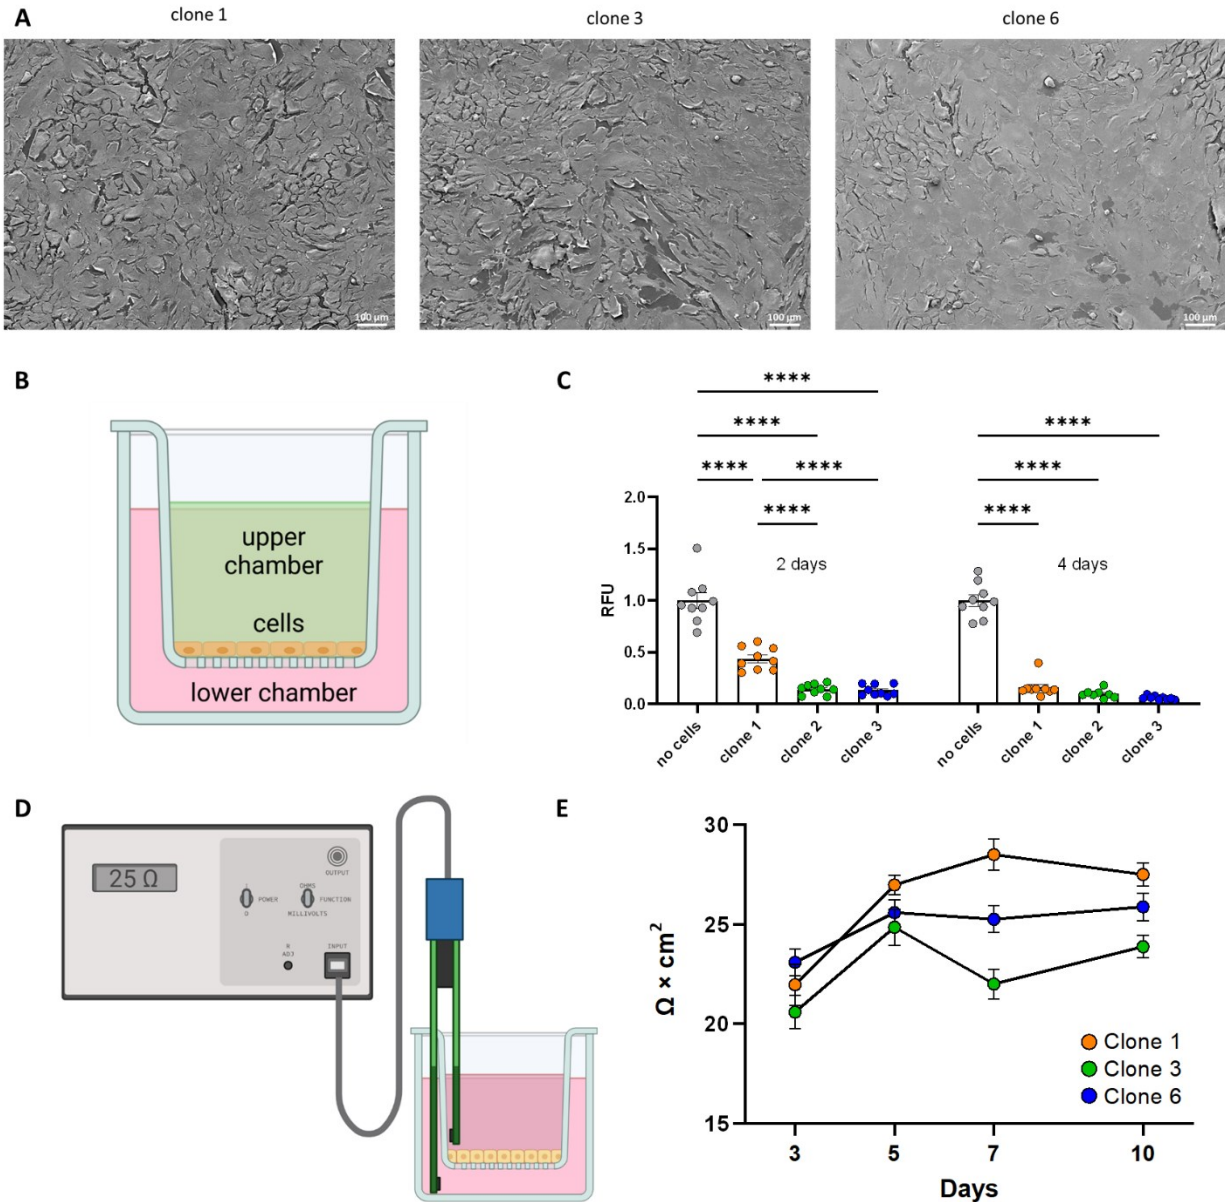

**Figure S1.**

Validation of the epithelial character of three immortalized human lacrimal gland cell clones. **A)** Scanning electron microscopy of the surface of clone 1, 3 and 6 after cells reached confluence. **B)** Cartoon of FITC-dextran permeability assay setup. The figure is partly created with BioRender.com. **C)** Relative fluorescence units (RFU) measured after 30 minutes in the lower chamber of wells with cell culture inserts containing cells of clone 1, 3 and 6 after 2 or 4 days of growth. Data are means  $\pm$  SEM [ $*p < 0.05$ ,  $**p < 0.01$ ,  $***p < 0.001$ , and  $****p < 0.0001$ , Two-way ANOVA,  $N = 3$ ]. **D)** Cartoon of TEER measurement setup. The figure is partly created with BioRender.com **E)** TEER values measured in transwell inserts containing cells of clone 1, 3 and 6 after 3, 5, 7 and 10 days. Data are means  $\pm$  SEM [ $N = 12$ ].

| gene   | protein                                   |
|--------|-------------------------------------------|
| ACTA2  | Smooth Muscle Actin Beta 2                |
| AQP5   | Aquaporin 5                               |
| CD14   | Monocyte Differentiation Antigen CD14     |
| CD34   | Sialomucine                               |
| COL1A2 | Collagen Type I Alpha 2 Chain             |
| COL6A2 | Collagen Type VI Alpha 2 Chain            |
| CST6   | Cystatin 6                                |
| CSTB   | Cystatin B                                |
| DES    | Desmin                                    |
| FN1    | Fibronectin 1                             |
| FOXC1  | Forkhead Box C1                           |
| HAS2   | Hyaluronan Synthase 2                     |
| LUM    | Lumican                                   |
| MFAP5  | Microfibril Associated Protein 5          |
| MYL9   | Myosin Light Chain 9                      |
| PALLD  | Palladin                                  |
| PAX6   | Paired Box Gene 6                         |
| PDGFRB | Platelet Derived Growth Factor Receptor B |
| POSTN  | Periostin                                 |
| VIM    | Vimentin                                  |
| VWF    | Von Willebrand Factor                     |

**Table S1.**

List of marker genes for lacrimal gland epithelial cells, endothelial cells, mesenchymal stem cells, myoepithelial cells and fibroblasts.

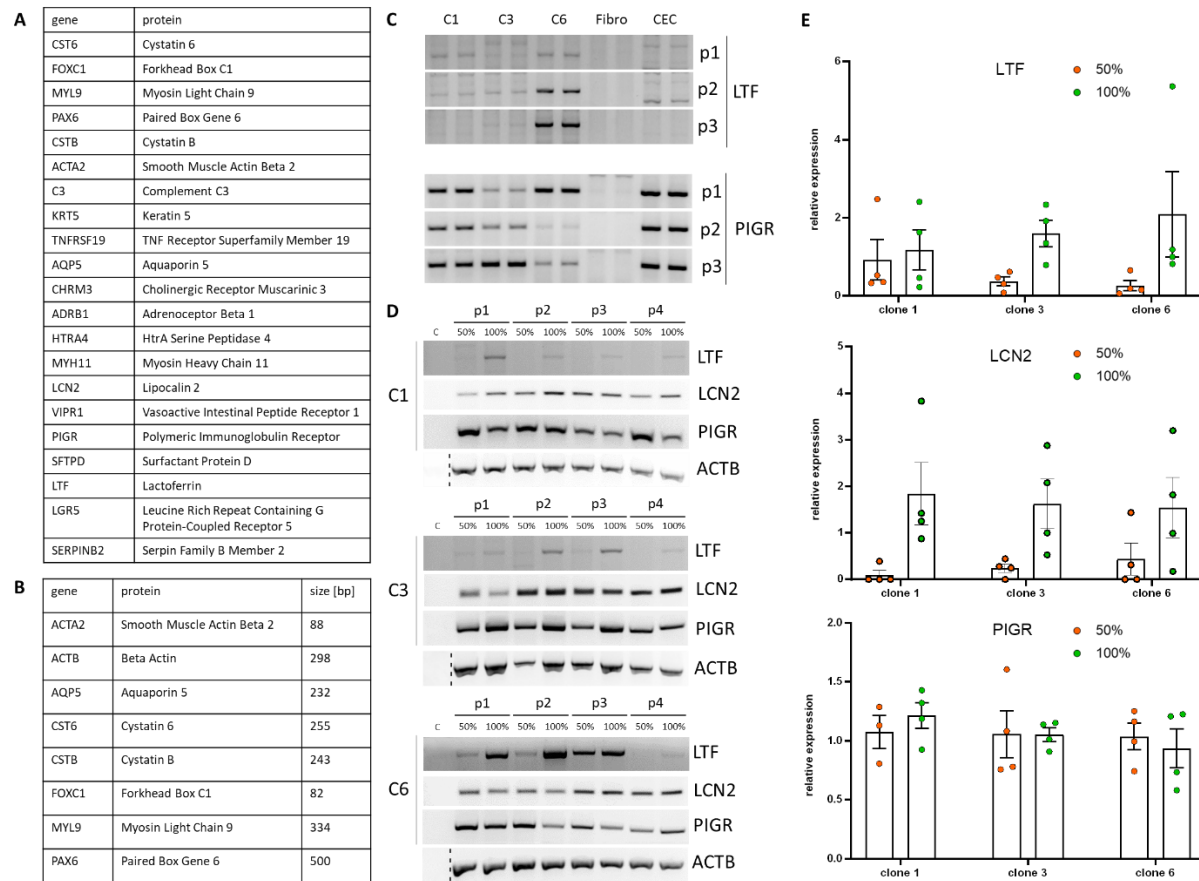

**Figure S2.**

Comparison of expression of different lacrimal gland marker genes. **A)** List of lacrimal gland marker genes. **B)** List of the marker genes tested in Fig. 3B with gene names, names of the respective protein product and the expected amplicon size. **C)** Agarose gels with the amplification products of RT-PCR for the tear fluid proteins lactoferrin (LTF) and Polymeric Immunoglobulin Receptor (PIGR) at three different passages (p1, p2, p3) for clone 1 (C1), 3 (C3), 6 (C6), human fibroblasts (Fibro) and human corneal epithelial cells (CEC). **D)** Agarose gels with the amplification products of RT-PCR for LTF, LCN2, PIGR and actin beta (ACTB) at 50 % and 100 % confluence at four different passages (p1-p4) for clone 1, 3 and 6 and a negative control (C). **E)** Semiquantitative comparison of LTF, LCN2 and PIGR expression level in clone 1, 3 and 6 at 50 % and 100 % confluence. Data are means  $\pm$  SEM [Two-way ANOVA, N = 4].

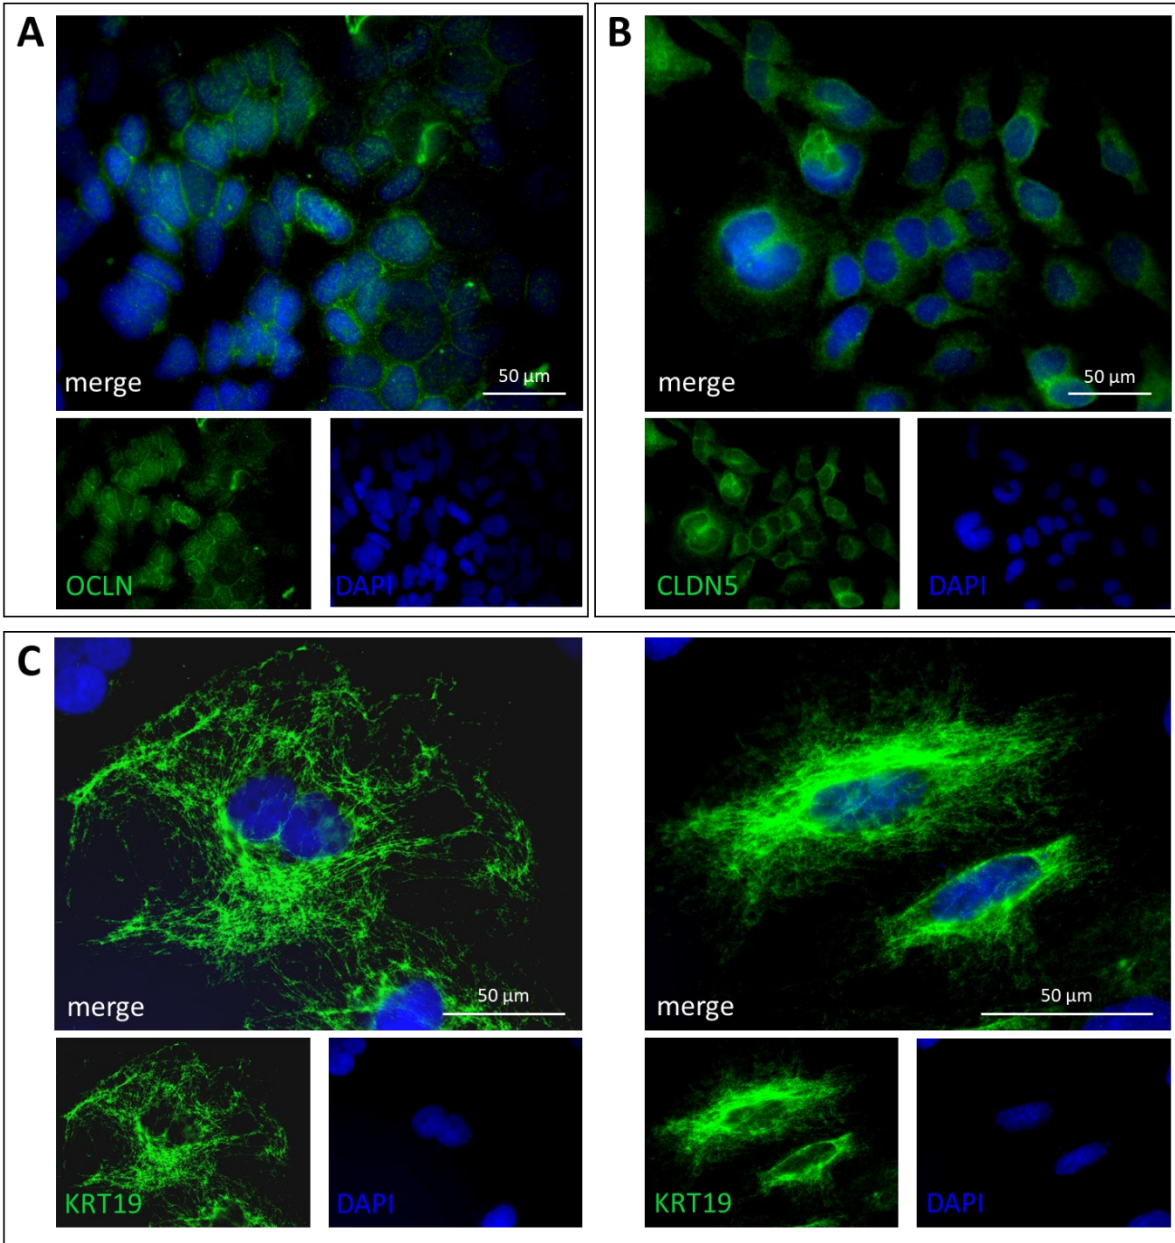

**Figure S3.**

Immunofluorescence image of clones 1, 3 and 6 stained against DAPI (blue) and occludin (OCLN, green, A, clone 1), claudin 5 (CLDN5, green, B, clone 3) and cytokeratin 19 (KRT19, green, C, clone 1 left, clone 6 right).

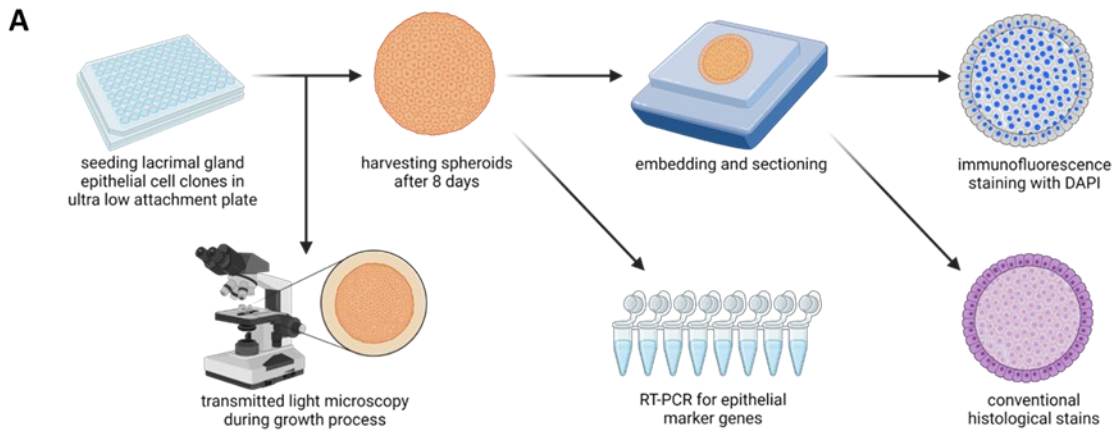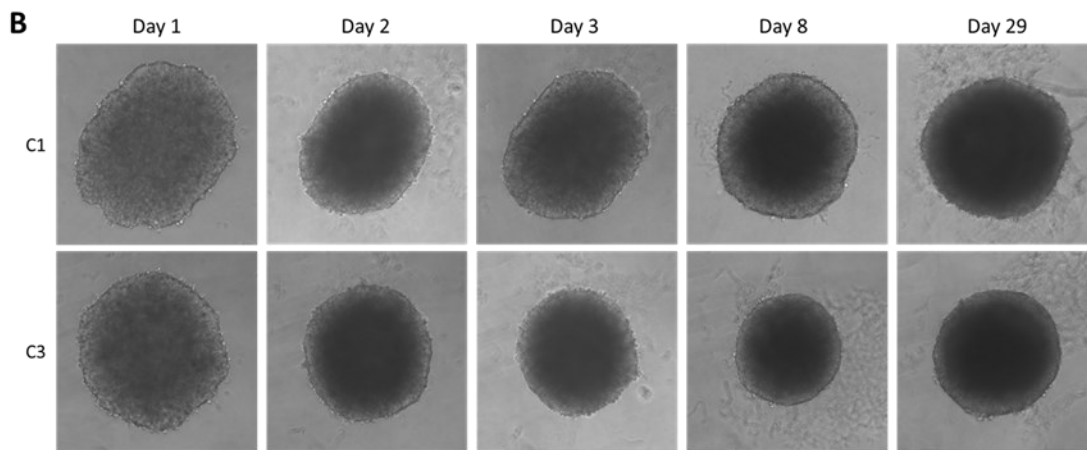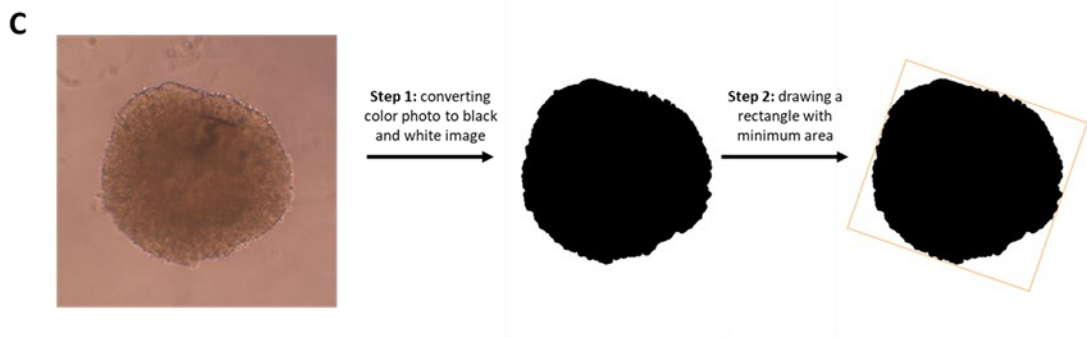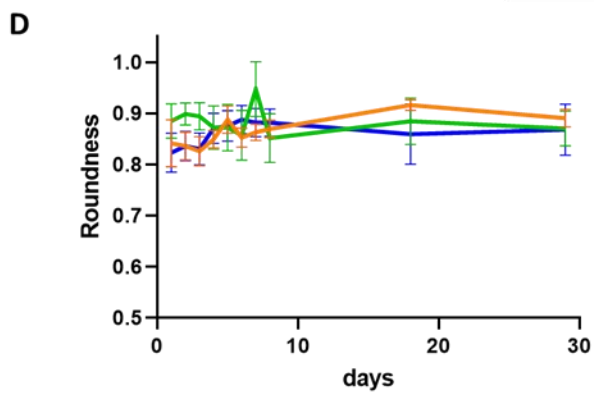

#### **Figure S4.**

Analysis of spheroidal growth. **A)** Cartoon illustrating the workflow from the lacrimal gland cells clones to 3D spheroids and their analysis. The figure was partly created with BioRender.com. **B)** Transmitted light microscopy during the 29 days culture period of 3D grown cells of clone 1 (C1) and 3 (C3). **C)** To determine the circularity of the spheroids, in the first step the microscopic images were converted to black and white images for representing each spheroid as a black object on white background. In the second step, these images were analyzed using an in-house Python script for measuring the size of objects in an image with OpenCV. This script draws a rectangle with the minimum area around the black object and calculates the edge lengths of the rectangle. For exactly circular objects, both edges of the rectangle have the same length, while for elliptical objects the edge lengths differ. **D)** Roundness of the spheroids of clone 1 (orange), 3 (green) and 6 (blue) over the course of the 29 days culture period. Data are means  $\pm$  SEM. [Day 1-8 N = 24, day 18 N= 9, and 29 N = 9].



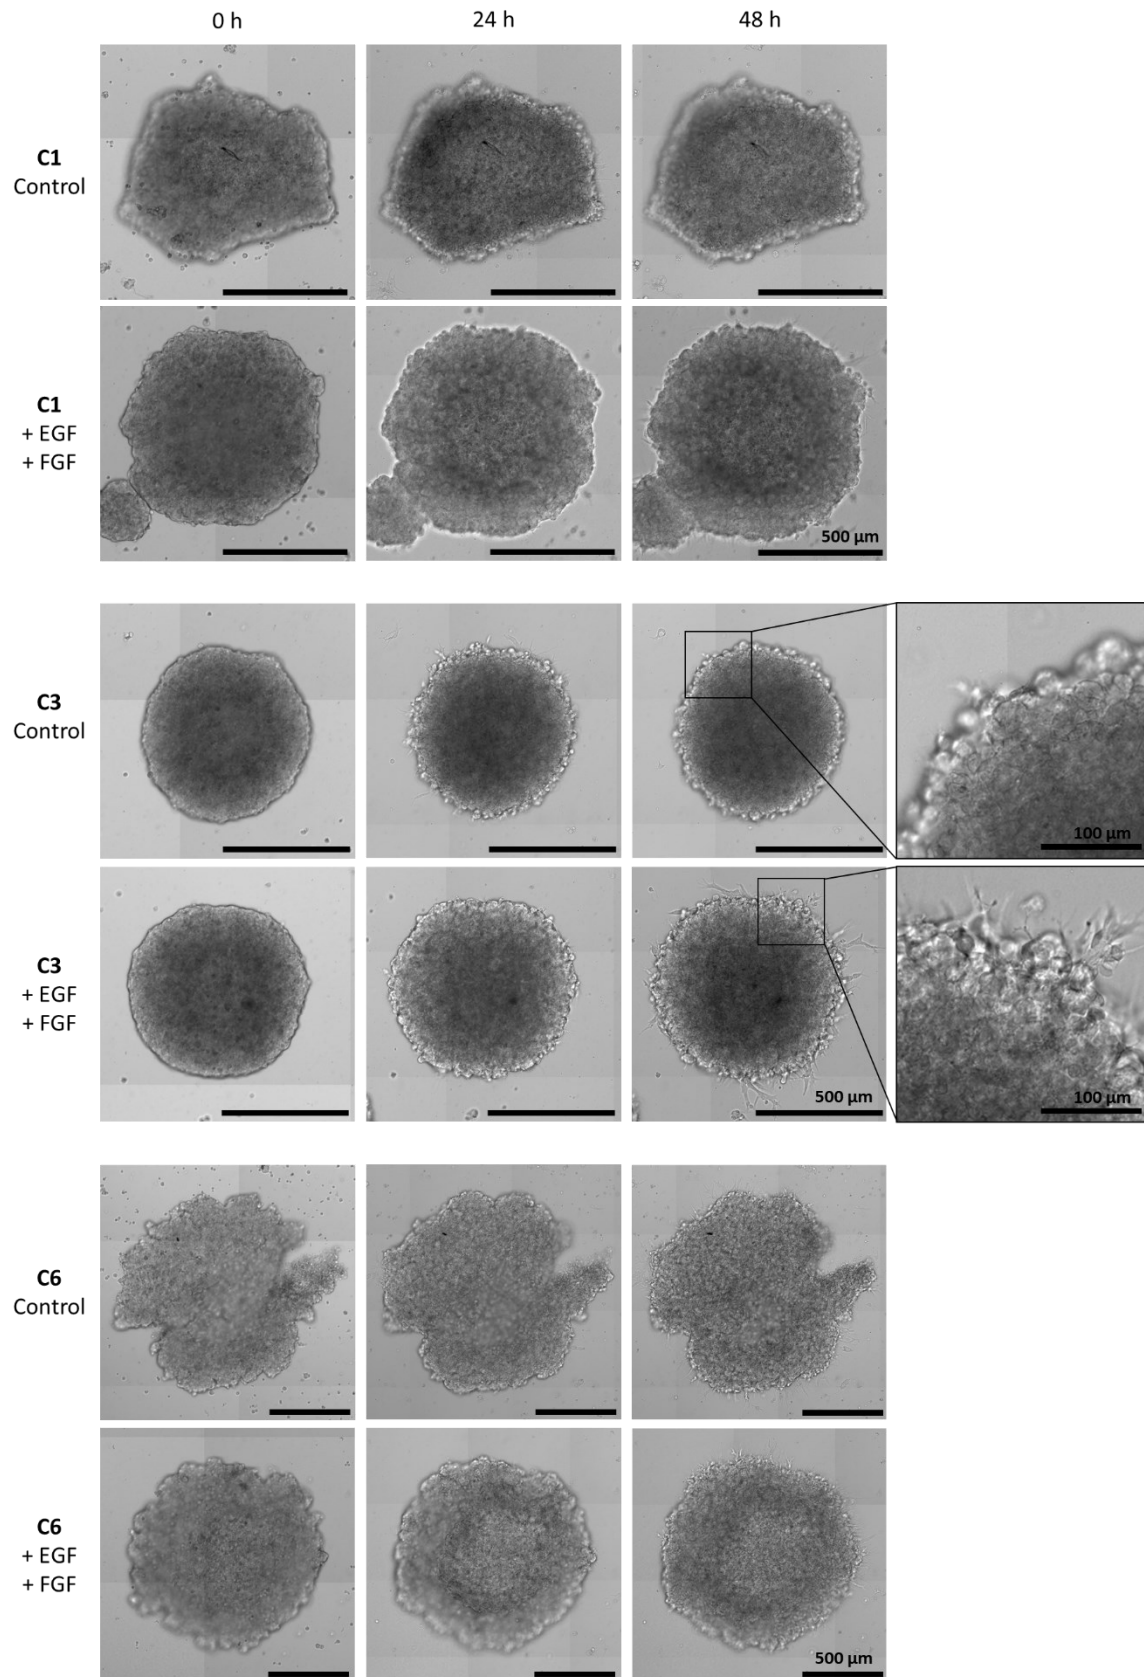



**Figure S5.**

Spheroids in extracellular matrix with and without growth factors. Epidermal growth factor (EGF) and fibroblast growth factor 10 (FGF10) added to the medium from buds after 0, 24 and 48 hours.

| <b>Abbreviation</b> | <b>Gene name</b>                                            |
|---------------------|-------------------------------------------------------------|
| ACTA2               | Actin Alpha 2, Smooth Muscle                                |
| ACTB                | Actin beta                                                  |
| ADRB1               | Adrenoceptor Beta 1                                         |
| AQP5                | Aquaporin 5                                                 |
| ATP5G3              | ATP Synthase Membrane Subunit G Locus 3                     |
| C3                  | Complement C3                                               |
| CADH1               | E-cadherin                                                  |
| CCL28               | C-C Motif Chemokine Ligand 28                               |
| CD14                | Monocyte Differentiation Antigen CD14                       |
| CD34                | Sialomucine                                                 |
| CD90, THY1          | Thy-1 Cell Surface Antigen                                  |
| CHRM3               | Cholinergic Receptor Muscarinic 3                           |
| Col1A2              | Collagen Type I Alpha 2 Chain                               |
| Col6A2              | Collagen Type VI Alpha 2 Chain                              |
| CST6                | Cystatin 6                                                  |
| CSTB                | Cystatin B                                                  |
| DCBLD2              | Discoidin, CUB And LCCL Domain Containing 2                 |
| DES                 | Desmin                                                      |
| EEF1A1              | Eukaryotic translation elongation factor 1 alpha            |
| EHF                 | ETS Homologous Factor                                       |
| FN1                 | Fibronectin 1                                               |
| FOXC1               | Forkhead Box protein C1                                     |
| HAS2                | Hyaluronan Synthase 2                                       |
| HSPG2               | Heparan Sulfate Proteoglycan 2                              |
| HTRA4               | HtrA Serine Peptidase 4                                     |
| Hu18s, 18S          | 18S ribosomal RNA                                           |
| LCN2                | Lipocalin 2                                                 |
| LGR5                | Leucine Rich Repeat Containing G Protein-Coupled Receptor 5 |
| LMO4                | LIM Domain Only 4                                           |
| LTF                 | Lactotransferrin                                            |
| LUM                 | Lumican                                                     |
| LYZ                 | Lysozyme                                                    |
| MFAP5               | Microfibril Associated Protein 5                            |
| MT2A                | Metallothionein 2A                                          |
| MYH11               | Myosin Heavy Chain 11                                       |

|          |                                                      |
|----------|------------------------------------------------------|
| MYL9     | Myosin Light Chain 9                                 |
| PALLD    | Palladin                                             |
| PAX6     | Paired Box Gene 6                                    |
| PDGFRB   | Platelet Derived Growth Factor Receptor Beta         |
| PIGR     | Polymeric immunoglobulin receptor                    |
| POSTN    | Periostin                                            |
| PXDN     | Peroxidasin                                          |
| RBM47    | RNA Binding Motif Protein 47                         |
| RPL10    | Ribosomal protein 10                                 |
| RPL21    | Ribosomal protein 21                                 |
| RPL3     | Ribosomal protein 3                                  |
| RPL7     | Ribosomal protein 7                                  |
| SERPINB2 | Serpin Family B Member 2                             |
| SFTPD    | Surfactant Protein D                                 |
| SKA2     | Spindle And Kinetochore Associated Complex Subunit 2 |
| SLC14A1  | Solute Carrier Family 14 Member 1 (Kidd Blood Group) |
| SMC2     | Structural maintenance of chromosomes 2              |
| SMC4     | Structural maintenance of chromosomes 4              |
| SRPRA    | SRP receptor subunit alpha                           |
| STK39    | Serine/Threonine Kinase 39                           |
| STMN1    | Stathmin 1                                           |
| SV40     | Simian virus antigen 40                              |
| TNFRSF19 | TNF Receptor Superfamily Member 19                   |
| TNKS1BP1 | Tankyrase 1 Binding Protein 1                        |
| TOP2A    | DNA topoisomerase II alpha                           |
| TRIM2    | Tripartite Motif Containing 2                        |
| VIM      | Vimentin                                             |
| VIPR1    | Vasoactive Intestinal Peptide Receptor 1             |
| VWF      | Von Willebrand Factor                                |

**Table S2.**

List of abbreviations and gene names.
